1

2

3

4

## Demonstrating and disrupting well-learned habits

5

6

7

8

9 Ahmet O. Ceceli<sup>1</sup>, Catherine E. Myers<sup>2,3</sup>, Elizabeth Tricomi<sup>1\*</sup>

10

11

12

13

14 <sup>1</sup>Department of Psychology, Rutgers University-Newark, Newark, NJ, United States of America

15 <sup>2</sup>Neurobehavioral Research Laboratory, VA New Jersey Health Care System, East Orange, NJ,

16 United States of America

17 <sup>3</sup>Department of Pharmacology, Physiology & Neuroscience, New Jersey Medical School,

18 Rutgers University, Newark, NJ, United States of America

19

20 \*Corresponding author

21 Email: [etricomi@rutgers.edu](mailto:etricomi@rutgers.edu) (ET)

22

## 23 **Abstract**

24 Researchers have exerted tremendous efforts to empirically study how habits form and dominate  
25 at the expense of deliberation, yet we know very little about breaking these rigid habits to restore  
26 goal-directed control. In a three-experiment study, we first illustrate a novel approach of  
27 studying well-learned habits, in order to effectively demonstrate habit disruption. In Experiment  
28 1, we use a Go/NoGo task with familiar color-response associations to demonstrate outcome-  
29 insensitivity when compared to novel, more flexible associations. Specifically, subjects perform  
30 more accurately when the required mapping is the familiar association of green–Go/red–NoGo  
31 than when it is red–Go/green–NoGo, confirming outcome-insensitive, habitual control. As a  
32 control condition, subjects show equivalent performance with unfamiliar color-response  
33 mappings (using the colors blue and purple mapped to Go and NoGo responses). Next, in  
34 Experiments 2 and 3, we test a motivation-based feedback manipulation in varying magnitudes  
35 (i.e., performance feedback with and without monetary incentives) to break the well-established  
36 habits elicited by our familiar stimuli. We find that although performance feedback prior to the  
37 contingency reversal test is insufficient to disrupt outcome-insensitivity in Experiment 2, a  
38 combination of performance feedback and monetary incentive is able to restore goal-directed  
39 control in Experiment 3, effectively breaking the habits. As the first successful demonstration of  
40 well-learned habit disruption in the laboratory, these findings provide new insights into how we  
41 execute and modify habits, while fostering new and translational research avenues that may be  
42 applicable to treating habit-based pathologies.

43

44

45

## 46 **Introduction**

47           When categorizing motivated behaviors, habits are distinguished from goal-directed  
48 actions in that they are performed reflexively in response to a triggering cue, without  
49 consideration of the consequences [1]. These habitual behaviors are less cognitively taxing than  
50 their goal-directed counterparts, allowing for their utilization in instances where the resource-  
51 consuming reflection of potential outcomes may not be ideal [2–4]. For example, looking both  
52 ways before crossing a street is an action best elicited habitually, and ideally should persist  
53 despite the absence of oncoming traffic. In contrast, the optimal motivational control system for  
54 commuting to a new destination would be outcome-reliant, reflective, and thus resource-  
55 consuming goal-directed performance.

56           For decades, the motivational bases of behavioral control (i.e., goal-directed and habitual  
57 actions) have been investigated in rodent models. In a typical study examining habitual control, a  
58 neutral stimulus (e.g., a visual cue, or the context of the chamber) signals hungry rats to press a  
59 lever in pursuit of a food outcome. This behavioral training period is often followed by a  
60 devaluation procedure—the rat is allowed free-access to the food, promoting satiation and  
61 diminishing the food’s value (hence the term *devaluation*). In a subsequent, unrewarded,  
62 extinction phase, the experimenter can then assess whether the trained lever-press action is  
63 flexible and goal-directed (i.e., strong responses when animal is hungry but diminished responses  
64 when satiated), or rigid and habitual (i.e., persistent responses regardless of satiation) [5].  
65 Generally, over-training of the stimulus—response—outcome association tends to render actions  
66 habitual. Thus, an over-trained rat persists in pressing the lever despite a diminished value in  
67 outcome, suggesting that the actions are driven by the preceding cue or the chamber context. In  
68 contrast, value-driven goal-directed control survives following moderate experience with the

69 stimulus–response–outcome chain [6]. Motivational control testing in humans has followed suit  
70 with similar operant conditioning paradigms, in which a primary or a secondary reward is  
71 devalued to determine whether actions are cue or value driven [7–12]. Another widely-used  
72 example is the sequential decision task, in which subjects respond to probabilistic multi-step  
73 associative sequences and recruit model-based (i.e., goal-directed; taking into account the  
74 cognitive model of the task environment) or model-free (i.e., similar to habits; actions based  
75 solely on history of reward receipt) strategies to maximize gain and minimize loss [13].

76         These methods have undoubtedly contributed a great deal to our understanding of habits;  
77 however, such paradigms are limited in critical aspects. Indeed, the habit experience has been a  
78 difficult construct to effectively capture via behavioral paradigms in humans [14–16]. First, in  
79 contemporary paradigms, including those based on outcome-devaluation and sequential decision-  
80 making, the agent must develop a newly formed habit. Accordingly, the tools at our disposal  
81 facilitate the study of novel, lab-developed habits, while leaving incomplete our understanding of  
82 well-learned habits that are more representative of daily experiences. For example, especially in  
83 outcome-devaluation tasks involving valued and devalued food rewards, testing whether a  
84 behavior is habitual relies on several critical factors. The demonstration of a habit may depend  
85 on successful over-training of a new cue–response–outcome association that develops a strong  
86 enough link between the cue and the response to guide behavior [11]. Furthermore, the  
87 effectiveness of the devaluation procedure where a food outcome is selectively fed to diminish  
88 its value may become problematic in humans for reasons not encountered in rats, such as demand  
89 characteristics, and hesitation to eat copious amounts of junk food in a potentially socially  
90 intimidating lab setting. Lastly, the experimenter makes assumptions of comparable food  
91 palatability, in that the agent must value the food options similarly prior to selective devaluation

92 for any value-based manipulation to be effective [11]. These lab-generated habits are also  
93 arduous to develop via over-training, especially in expensive neuroimaging contexts. More  
94 importantly, the strength of the trained habit would be insufficient for a meaningful investigation  
95 of the habit-breaking process, in that even multi-day training is often measured in minutes to  
96 hours [11,17]. Thus, the current tools provide a costly platform that only captures the  
97 unidirectional shift from goal-directed to habitual control [18]. In other words, although these  
98 novel, lab-created associations permit the study of habit formation and execution, we are limited  
99 in our tools to investigate habit disruption with similar efficacy.

100           Despite tremendous efforts directed towards understanding habit formation and  
101 expression, a wider gap in the literature remains regarding the breaking of habits. Accessing the  
102 shift from habitual to goal-directed control may ultimately facilitate interventions that remediate  
103 rigid and maladaptive behaviors, yet we are not currently methodologically equipped to tackle  
104 this translational research avenue with a rich toolkit. Accordingly, we propose that developing a  
105 novel habit from an action–outcome contingency is not a pre-requisite for studying the  
106 motivational basis for habits, but that an existing, more robust habit could be examined in the lab  
107 with less effort. An effective approach may involve using salient cues that elicit well-established,  
108 habit-like behaviors that are impervious to their consequences. For instance, the colors red and  
109 green have highly specific “stop” and “go” associations, possibly strengthened in a variety of  
110 contexts including traffic lights, visual signals of danger and safety, and childhood games, songs,  
111 and stories [19]. The familiar red–stop and green–go contingencies have previously been  
112 transformed into Go/NoGo tasks to assess response inhibition via perseverative errors (i.e.,  
113 NoGo accuracy) [19–21]. Similarly, we can test for behavioral rigidity by assessing performance  
114 when these contingencies are congruent with daily experiences versus when adjusted to reflect

115 outcomes incongruent with most real-world scenarios. Thus, instead of devaluing the palatability  
116 of a primary reward, we render a well-learned association inappropriate for optimal task  
117 performance. The agent must override a prepotent red stimulus–stop response with an  
118 incongruent green stimulus–stop response to achieve the intended, correct outcome. A more  
119 pronounced accuracy impairment when managing incongruencies within this well-learned color-  
120 response mapping, compared to changes in a newly-acquired mapping, would permit us to  
121 conclude that these familiar stimuli evoke outcome-insensitive actions, the hallmark of habitual  
122 behavior. Upon establishing that these familiar stimuli elicit habitual control, we can then  
123 provide the platform to study habit disruption by testing manipulations that protect against  
124 mapping-related performance impairments—essentially overriding the habitual response by  
125 engaging cognitive control processes. The motivational control framework identifies habits as  
126 cue-dependent, and goal-directed behaviors as those contingent on the outcome [1]. Accordingly,  
127 a previously goal-directed behavior is rendered habitual when the associative strength of the  
128 stimulus–response component governs actions, rendering the outcome inessential for action  
129 execution. A promising strategy for restoring goal-directed control may be via boosting the  
130 salience of the outcome—for instance, by enhancing the link between the response and outcome.

131         Providing opportunities for performance tracking and administering other forms of  
132 performance-based feedback (e.g., primary and secondary rewards) have been used extensively  
133 in enhancing behavioral output [22,23]. For instance, the delivery of performance tracking  
134 information combined with a monetary reward successfully improved performance on a visual  
135 task [23]. A combination of primary and secondary rewards (e.g., juice and monetary incentives)  
136 has also been documented to improve goal-directed performance on a cued task-switching  
137 paradigm via motivational enhancement [24]. The promise of a future reward contingent on

138 performance has sufficed in improving performance during task-switching, and accelerating  
139 responses during a reaction time task with congruent and incongruent stimuli [25,26].  
140 Furthermore, trial-by-trial, transient monetary incentives (i.e., increasing reward magnitudes  
141 from low to high across trials) have served as salient performance boosters in tasks that taxed  
142 executive control, as well as visual perception [27]. Taken together with the finding that  
143 performance-contingent monetary rewards engage top-down control on task-switching [28],  
144 performance tracking and performance-contingent rewards may be prime candidates for  
145 enhancing goal-directed behavioral control. Thus, we propose that boosting motivation via  
146 performance-contingent feedback (e.g., intrinsic and extrinsic rewards that promote task  
147 performance improvements) may serve as a useful tool in restoring flexibility in otherwise rigid  
148 behaviors.

149         To achieve the goal of demonstrating and breaking a well-established habit, we introduce  
150 in Experiment 1 our novel Go/NoGo task that capitalizes on the familiar Green–Go, Red–NoGo  
151 associations people typically develop throughout the course of their lives. If the red–stop and  
152 green–go associations are well-learned, outcome-insensitive habits, there should be within-  
153 subject decrements in performance on an incongruent mapping of color to response (green–stop,  
154 red–go) compared to the well-learned congruent mapping (red–stop, green–go). That is, if  
155 participants are responding habitually, they should be more accurate when withholding responses  
156 to the red NoGo cue, and more likely to make errors of commission (e.g., responding to green  
157 cue when instructed to withhold responding), than if they are responding in a goal-directed  
158 manner. In comparison, there should be no such within-subject differences between novel color–  
159 response mappings (e.g. blue–stop, purple–go vs. purple–stop, blue–go). Then, in Experiments 2  
160 and 3, we explore strategies to disrupt the well-learned red-stop, green-go habit by amplifying

161 the salience of the action outcomes. Specifically, we use cumulative performance-contingent  
162 feedback to remediate the incongruity-related impairment—in an effort to restore goal-directed  
163 control in the face of habit-eliciting stimuli by reducing outcome-insensitive responses.

## 164 **Experiment 1**

### 165 **Methods**

#### 166 **Participants**

167 We recruited 50 undergraduate students (32 female, 18 male participants;  $M_{\text{age}}=20.28$ ,  
168  $SD_{\text{age}}=2.96$ ) from the Rutgers University-Newark campus for course credit. All subjects provided  
169 informed consent. Study protocols were approved by the Rutgers University Institutional Review  
170 Board. Participants were excluded if they reported having color-blindness.

#### 171 **Materials and Procedures**

172 Participants were administered the Barratt Impulsivity Scale (BIS) [29], and randomly  
173 assigned to one of two stimulus type conditions (Familiar or Novel stimuli). They underwent a  
174 Go/NoGo task in which either Green and Red (Familiar condition) or Purple and Blue (Novel  
175 condition) traffic lights comprised Go and NoGo signals. Participants were instructed to respond  
176 as quickly and accurately to these stimuli as possible using the keyboard. A second phase  
177 followed in which the color-response contingencies were swapped (see Fig 1). Note that in the  
178 Familiar condition, the Green-Go/Red-NoGo mapping was considered “congruent” with  
179 associations in everyday life, while the Red-Go/Green-NoGo mapping was considered  
180 “incongruent.” We assumed that the Novel stimuli have no well-established Go or NoGo  
181 associations in daily life. The order in which participants underwent the two phases of the task  
182 was counterbalanced to ensure that the results could not be attributed to a specific order of  
183 managing the contingencies. Thus, we were able to examine the rigidity of our Familiar



184 behavioral contingencies hypothesized to elicit outcome-insensitive responses in relation to a  
185 Novel stimulus set. An exit survey with demographic information concluded the study.

186

187 **Fig 1. Go/NoGo task with familiar and novel lights.** Participants are assigned to Familiar or  
188 Novel conditions. In the Familiar condition, subjects complete two phases: one where green  
189 signals Go and red signals NoGo (“congruent” mapping) and one where red signals Go and  
190 green signals NoGo (“incongruent” mapping). In the Novel condition, participants complete two  
191 similar phases, but the colors are blue and purple, for which there should be no strong pre-  
192 existing associations with “stop” and “go” responses. We predicted more commission errors in  
193 the Familiar condition for incongruent than congruent mappings, indicating outcome  
194 insensitivity, with no such within-subject differences expected in the Novel condition. Phase  
195 orders were counterbalanced across subjects.

196

197 Each phase comprised 100 Go and 20 NoGo trials (5:1 Go-NoGo ratio). The Go/NoGo  
198 stimuli remained onscreen for 400 milliseconds (ms), and each response produced a brief  
199 “correct” or “incorrect” text slide that offset after 400 ms (e.g., failure to withhold response in a  
200 NoGo trial produced the “incorrect” text slide). Go responses had to be performed before  
201 stimulus offset to be registered as correct by pressing the “1” key on the keyboard. The inter-trial  
202 intervals varied randomly between 1200 and 2400 ms to ensure engagement with the task. All  
203 participants completed a brief practice session (six correct Go or NoGo responses) using the  
204 same stimuli as the first phase. This practice session was conducted with the experimenter  
205 present to ensure the comprehension of instructions.

206           If these familiar associations elicit habitual, cue-driven behavioral control, subjects in the  
207 Familiar condition should experience a significant impairment in NoGo accuracy task demands  
208 when incongruent with lifelong experiences (Green–NoGo), compared to when they are  
209 congruent with lifelong experiences (Red-NoGo). In contrast, because the blue and purple  
210 stimuli are not expected to have strong Go or NoGo associations, participants in the Novel  
211 condition should show similar performance levels for both color–response mappings, illustrating  
212 the flexibility of responses executed towards the novel stimuli.

### 213 **Data Analysis**

214           Because the moderate ratio of Go to NoGo signals was expected to produce pre-potent  
215 Go responses [30], NoGo accuracy served as the primary measure of interest. As a secondary  
216 measure of outcome-sensitivity, identical analyses were performed using Go accuracy as  
217 dependent variable (DV). A mixed ANOVA with a DV of NoGo accuracy, Condition (Familiar  
218 or Novel stimulus conditions) as a between-subjects factor, and Mapping (congruent or  
219 incongruent mapping in the Familiar, and arbitrary color–response mapping in the Novel  
220 condition) as a within-subjects factor, was performed using Age, Gender, and Impulsivity (BIS  
221 score) as covariates. Post-hoc t-tests were employed to detect mapping-related differences in  
222 both conditions. We also performed a confirmatory omnibus test containing information from  
223 both conditions—a hierarchical multiple regression to test the predictive strength of the  
224 Condition variable on mapping-related impairment. We summarize these omnibus regression  
225 data below, but refer readers to the supplement for details (S1 and S2 Tables). Similar analyses  
226 were performed with Go response time (RT) as DV to further explore the data.

227           To determine sample size for our study, we performed an *a priori* power analysis using  
228 the effect size from an existing study examining Go/NoGo contingency change [31]. A within-

229 group comparison of commission errors due to contingency change—one similar to the primary  
230 analyses reported above—determined that 12 participants would be needed per group to reach  
231 80% statistical power. We adjusted this sample size in accordance with our two between-subjects  
232 factors that yielded four groups, (two Condition levels and two Order levels – that is, the  
233 counterbalanced orders in which participants completed the two phases of the task), warranting a  
234 sample size of 50.

## 235 **Results**

### 236 **Primary index of outcome-sensitivity: NoGo accuracy**

237 To examine whether Condition (Familiar or Novel) predicted outcome-sensitivity, we  
238 performed a repeated measures ANOVA using NoGo accuracy as the DV, Condition as a  
239 between-subjects factor, Mapping as a within-subjects factor, controlling for Age, Gender, and  
240 Impulsivity as covariates. We found no main effect of Condition,  $F(1,45) = 0.99, p = .325, \eta_p^2 =$   
241  $.02$ , or Mapping,  $F(1,45) = 0.10, p = .748, \eta_p^2 < .01$ . but as evident in Fig 2, we found a  
242 significant Condition x Mapping interaction.  $F(1,45) = 8.65, p = .005, \eta_p^2 = .16$ . The congruent  
243 mapping produced higher accuracy compared to the incongruent mapping, which was not  
244 different from performance to the novel stimuli. Post-hoc paired-samples t-tests further revealed  
245 a significant difference in NoGo accuracy in the Familiar condition,  $t(24) = 3.53, p = .002$ ,  
246 suggesting that the congruent “Red–NoGo” mapping elicits fewer errors of commission  
247 compared to the incongruent “Green–NoGo” mapping—a difference indicative of outcome-  
248 insensitive, habitual control. Contingency change yielded no differences in errors of commission  
249 between phases in the Novel condition, supporting the labile nature of newly learned  
250 associations,  $t(24) = -0.88, p = .387$ .

251

252 **Fig 2. Familiar stimuli elicit mapping-related impairments in NoGo accuracy.** The  
253 congruent mapping produces higher accuracy compared to the incongruent mapping, which is  
254 not different from performance to the novel stimuli. Specifically, participants make significantly  
255 fewer errors of commission when the NoGo signal is red compared to green. There is no  
256 difference in accuracy in the Novel condition when the NoGo signal is purple vs. blue. Condition  
257 x Mapping interaction:  $p = .005$ . Error bars depict standard error of mean (SEM). Color of bars  
258 reflects NoGo stimulus colors.

259

260 The omnibus regression test confirmed the significant effect of Condition. When  
261 controlling for participants' age, gender, and self-reported impulsivity, the inclusion of the  
262 Condition regressor in the hierarchical multiple regression model explained an additional 15.5%  
263 of the variance in outcome-sensitivity:  $\beta_{\text{Condition}} = -0.40$ ,  $p = .006$ ,  $\Delta R^2 = .15$ , indicating  
264 differential outcome-sensitivity across Familiar and Novel conditions. The details of this  
265 omnibus regression test and beta weights of all model parameters can be found in the supplement  
266 (S1 Table).

## 267 **Secondary index of outcome-sensitivity: Go accuracy**

268 A mixed-design ANOVA controlling for Age, Gender, and Impulsivity as covariates,  
269 using Go accuracy as the DV revealed no main effect of Condition,  $F(1,45) = 0.19$ ,  $p = .667$ ,  $\eta_p^2$   
270  $< .01$ , or Mapping,  $F(1,45) = 2.93$ ,  $p = 0.094$ ,  $\eta_p^2 = .06$ , but a near-significant Condition x  
271 Mapping interaction at  $F(1,44) = 3.93$ ,  $p = .054$ ,  $\eta_p^2 = .08$  (Fig 3). Post-hoc paired-samples t-tests  
272 suggested a Go accuracy impairment only in the Familiar condition,  $t(24) = 3.10$ ,  $p = .005$ ,

273 whereas no mapping-related Go impairment was observed in the Novel condition,  $t(24) = 0.28$ ,  $p$   
274  $= .785$ .

275

276 **Fig 3. Familiar stimuli elicit mapping-related impairments in Go accuracy.** Subjects  
277 perform worse when the Go signal is red compared to green. No such differences are seen in the  
278 Novel condition, when Go signal is blue vs. purple. Condition x Mapping interaction:  $p = .054$ .  
279 Error bars depict standard error of mean. Color of bars reflects Go stimulus colors.

280

281 The omnibus regression test also confirmed the role played by Condition on our  
282 secondary assay of outcome-sensitivity, Go accuracy. Controlling for participants' age, gender,  
283 and impulsivity scores, the inclusion of the Condition regressor significantly predicted mapping-  
284 related Go accuracy changes:  $\beta_{\text{Condition}} = -0.27$ ,  $\Delta R^2 = .07$ ,  $p = .049$  (see S2 Table for details).  
285 Lastly, similar analyses performed with Go RT as DV yielded no significant results (all  $ps >$   
286  $.05$ ).

287 These Go accuracy data lend support to the hypothesis that while red and green stimuli  
288 are rigid and habitual in triggering stop/go actions, blue and purple stimuli are not strongly  
289 associated with either of the stop/go outcomes, but instead are labile and sensitive to the changes  
290 in action-outcome contingencies.

## 291 **Discussion**

292 This experiment demonstrates that habitual behavior that capitalizes on existing, non-lab-  
293 derived associations, can be demonstrated in the lab. By using the strong links between the  
294 green-go and red-stop associations in a Go/NoGo task, we were able to quantify the degree of

295 flexibility to well-stamped in cue–response–outcome associations. Importantly, our results  
296 suggest that responses are more outcome-insensitive (i.e., habitual) when the stimulus meanings  
297 are congruent with our experiences with traffic lights in daily life (i.e., when a traffic light  
298 indicating “stop” is red, rather than green, blue or purple). We note that incongruency-related  
299 impairments alone are not enough to conclude that a response is habitual; rather this conclusion  
300 must be verified by a comparison of the habitual associations (i.e., green–go, red–stop) with the  
301 novel control condition Go/NoGo associations (i.e., purple–go, blue–stop). Specifically, these  
302 red and green light stimuli triggered outcome-insensitive actions as evidenced by an accuracy  
303 impairment when Go and NoGo contingencies were incongruent with their well-established  
304 meanings outside of the lab. In contrast, the novel purple–go and blue–stop contingencies are not  
305 well-established in one’s daily experiences, and their associative strength is limited to the  
306 participant’s brief experience in the lab. Therefore, compared to the familiar stimuli, the actions  
307 evoked by the novel stimuli are more flexible to contingency changes, as reflected by similar  
308 NoGo and Go accuracy scores for blue vs. purple.

309         It can be argued that if these familiar red and green stimuli elicit outcome-insensitive  
310 habits, one should also display lower accuracy rates to green-NoGo compared to blue or purple-  
311 NoGo contingencies. However, our results above suggest that green-NoGo performance is  
312 similar to those elicited by the novel stimuli. The comparable performance here may be due to  
313 between-subject designs requiring more power compared to within-subject designs [36], thus  
314 making it more difficult to detect a potential decrement in green-NoGo accuracy. We further  
315 examine the unexpected pattern observed here in Experiments 2 and 3, with the prediction that  
316 with sufficient power, the green-NoGo mapping will indeed elicit lower accuracy rates compared  
317 to either Novel condition NoGo mapping.

318           Assessing motivational control, which attributes the source of one’s actions to either a  
319 preceding cue or its consequences, has long relied on experimental manipulations of outcome  
320 value. Rodent and human studies employing outcome-devaluation procedures of food rewards  
321 have depended on the subjects’ comparable palatability of the foods used in the research, as well  
322 as the development of an outcome-insensitive habit via over-training of these action-outcome  
323 contingencies [11,32]. Other researchers have made use of the instructed devaluation of  
324 outcomes, and computational investigations of choice strategy categorizations of model-based  
325 and model-free performance [10]. Although tremendously effective in their own avenues, a  
326 common area outside of the reach of these tasks is well-learned habits that better represent real  
327 world scenarios.

328           Our Go/NoGo task with familiar and novel stimuli provides new possibilities in studying  
329 habits. We demonstrate habits in a lab setting using stimuli that do not require lengthy training  
330 sessions to develop strong stimulus–response associations. This time- and cost-effective  
331 paradigm can serve as an especially useful tool in studying habits in expensive neuroimaging  
332 contexts. Perhaps more importantly, taking advantage of well stamped-in cue–response  
333 associations to study habits promises to contribute to translational science via new research  
334 avenues. For instance, although contemporary paradigms have proved fruitful in studying the  
335 formation and expression of habits, the nature of the tasks do not facilitate the investigation of  
336 habit disruption. Novel associations that have become outcome-insensitive following limited,  
337 lab-specific experience may not be rigid enough to represent real-world behaviors, and breaking  
338 these weak habits may not be translationally valuable.

## 339 **Experiment 2**

340 We attempt the breaking of well-learned habits in Experiment 2, in which we boost  
341 motivation via cumulative performance feedback prior to contingency reversal. Because the  
342 motivational control framework attributes habits to be driven by antecedent cues and goal-  
343 directed actions to be guided by resulting outcomes, we hypothesized that amplifying the  
344 salience of the outcome may promote goal-directed performance at the expense of habitual  
345 control, thus aiding in breaking the well-learned habit.

## 346 **Methods**

### 347 **Participants**

348 We recruited 100 undergraduate students (67 female and 33 male participants;  
349  $M_{\text{Age}}=20.26$ ,  $SD_{\text{Age}}=3.05$ ) from the Rutgers University-Newark campus. All participants  
350 provided informed consent and received course credit for their participation. Study protocols  
351 were approved by the Rutgers University Institutional Review Board. Participants were excluded  
352 if they reported having color-blindness.

### 353 **Procedures**

354 For the Go/NoGo task, participants were randomly assigned to a Feedback Group or No  
355 Feedback Group, and within each group, participants were randomly assigned to either Novel or  
356 Familiar condition, as in Experiment 1.

357 **Feedback Group:** After completing the BIS, participants underwent a similar Go/NoGo  
358 task to the one described in Experiment 1. Accordingly, each phase comprised 100 Go and 20  
359 NoGo trials (5:1 Go–NoGo ratio). As reported in Experiment 1, all stimuli remained on the  
360 screen for 400 ms, and responses produced brief feedback slides consisting of “correct” or



361 “incorrect” that offset after 400 ms (e.g., failure to withhold response in a NoGo trial produced  
362 the “incorrect” text slide). Go responses had to be performed before stimulus offset to be  
363 registered as correct by pressing the “1” key on the keyboard. The inter-trial intervals varied  
364 randomly between 1200 and 2400 ms to ensure engagement with the task. All subjects  
365 completed a brief practice session (six correct Go or NoGo responses) using the same stimuli  
366 that comprised the task. This practice session was conducted with the experimenter present to  
367 ensure the comprehension of instructions.

368         In the Familiar condition, participants were instructed to “Go” on green traffic light  
369 stimuli as quickly and accurately as possible, and withhold responses to the red traffic light.  
370 Next, a cumulative performance feedback manipulation followed, in which we displayed  
371 subjects’ percent NoGo accuracy scores on the screen. Participants were informed that the  
372 percentage score reflected their performance thus far (they were not informed that the score only  
373 reflected NoGo accuracy), and in the next phase of the task, the Go and NoGo signals would be  
374 reversed, such that they would need to make a response as quickly and accurately as possible to  
375 the red traffic light, and refrain from responding to the green traffic light. Identical feedback and  
376 task instructions were provided to the participants in the Novel condition regarding the change in  
377 contingencies of the purple–Go and blue–NoGo associations. It should be noted that Experiment  
378 1 reports differential mapping-related impairments across Familiar and Novel conditions  
379 regardless of the order in which phases were completed (S1-S2 Tables). Therefore, unlike  
380 Experiment 1, the phase orders in Experiment 2 were not counterbalanced, in that all participants  
381 in the Familiar condition underwent the congruent (Green–Go, Red–NoGo) mappings first,  
382 followed by the incongruent mappings; all participants in the Novel condition underwent the  
383 Purple–Go, Blue–NoGo mapping first, and these mappings were reversed in the second phase.

384 This change in experimental protocol enabled rendering the congruent contingency as baseline  
385 for participants in the Familiar group, and testing whether the presence of a mid-experiment  
386 performance manipulation affected subsequent incongruent task performance. An exit survey  
387 consisting of demographic questions concluded the experiment.

388 No Feedback Group: Participants in the No Feedback group underwent the same  
389 procedures as the Feedback group, except that no cumulative performance feedback was  
390 provided at any point. This No Feedback group served as a control condition for the Feedback  
391 group, as well as an internal replication of Experiment 1.

## 392 **Data Analysis**

393 To examine the role of Feedback, mixed-design ANOVAs with NoGo accuracy as DV,  
394 Feedback as a between-subjects and Mapping as a within-subjects factor were performed for  
395 each Condition, using the controlled variables Age, Gender, and Impulsivity as covariates. Post-  
396 hoc t-tests were carried out to examine mapping-related accuracy differences in both Feedback  
397 groups. As a secondary measure of outcome-sensitivity, identical analyses were performed using  
398 Go accuracy as a DV. Similar analyses were performed with Go RT as DV to further explore the  
399 data. It should be noted that we did not test for a three-way Condition x Feedback x Mapping  
400 interaction with any of our DVs, because our primary interest was determining whether  
401 cumulative performance feedback has any effect on motivational control, not necessarily whether  
402 this effect differs based on the familiarity of the stimuli. For example, we would not expect  
403 cumulative feedback to promote accuracy improvements in the Familiar Condition while  
404 impairing performance in the Novel condition.

405 Building from Experiment 1, we performed a confirmatory omnibus hierarchical multiple  
406 regression to test the predictive strength of the Condition and Feedback variables on mapping-

407 related impairment. The summary of the omnibus regression test is reported below, and its  
408 details can be found in the supplement (S3-S4 Tables).

409 We performed a power analysis using the effect size of the Condition x Mapping  
410 interaction in Experiment 1 ( $\eta_p^2 = .16$ ) and determined that a sample of 12 participants per group  
411 would be sufficient to reach 80% statistical power to detect the effect of differential accuracy  
412 rates due to Condition. We opted for this interaction value for our investigation of the role of  
413 feedback, because we wanted our feedback-related assertions to be grounded in predictions of a  
414 replicated effect of habitual performance to familiar, and goal-directed performance to novel  
415 stimuli. To further increase statistical power due to the addition of a Feedback group per  
416 condition, we increased our sample size to 25 per group—a total of 100 undergraduate students.

## 417 **Results**

### 418 **Primary index of outcome-sensitivity: NoGo accuracy**

419 We hypothesized that performance feedback may be a salient factor that can potentially  
420 restore goal-directed control when managing these well-established associations. However,  
421 cumulative performance feedback did not break the habits elicited by these familiar stimuli. We  
422 performed a mixed-design ANOVA using NoGo accuracy as the DV, and Age, Gender, and  
423 Impulsivity as covariates. We found no main effect of Feedback,  $F(1,45) = 0.08, p = .778, \eta_p^2$   
424  $<.01$ , or Mapping,  $F(1,45) = 1.96, p = .169, \eta_p^2 = .04$ , and we also found that no significant  
425 Feedback x Mapping interaction exists :  $F(1,45) = 0.08, p = .776, \eta_p^2 < .01$  (see Fig 4). Post-hoc  
426 t-tests revealed significant incongruency-related impairments in both Feedback,  $t(24) = 2.72, p =$   
427  $.012$ , and No Feedback,  $t(24) = 3.16, p = .004$ , groups, indicating that cumulative performance  
428 feedback did not prevent habitual control from dominating in the Familiar condition. Although  
429 we were unable to break habits as hypothesized here, our findings lend support to the rigidity of

430 these well-learned associations that persevere in the face of an otherwise salient motivational  
431 manipulation, performance feedback [33,34].

432

433 **Fig 4. Performance feedback does not significantly disrupt well-established habits.**

434 (A) In the Familiar condition, both Feedback and No Feedback groups suffer an incongruency-  
435 related impairment ( $p = .776$ ) in NoGo accuracy. (B) NoGo accuracy in the Novel condition is  
436 not significantly improved by performance feedback (sig. interaction of  $p = .033$ , non-sig. post-  
437 hoc t-tests:  $p > .05$ ). Error bars denote SEM. Color of bars reflects NoGo stimulus colors.

438

439 We performed a similar ANOVA to determine whether cumulative performance tracking  
440 improved goal-directed control of novel associations. As seen in Fig 4, we did not find a main  
441 effect of Feedback,  $F(1,45) = 0.40$ ,  $p = .528$ ,  $\eta_p^2 < .01$ , or Mapping,  $F(1,45) = 0.60$ ,  $p = .442$ ,  $\eta_p^2$   
442  $= .01$ , yet found a Feedback x Mapping interaction on NoGo accuracy in the Novel Condition  
443 when controlling for Age, Gender, and Impulsivity as covariates:  $F(1,45) = 4.84$ ,  $p = .033$ ,  $\eta_p^2 =$   
444  $.10$ . In sum, these results suggest that performance feedback alone may not be a salient enough  
445 manipulation to restore goal-directed control.

446 **Secondary index of outcome-sensitivity: Go accuracy**

447 We performed a mixed-design ANOVA of the Familiar condition data using Go accuracy  
448 as DV, Feedback as a between-, and Mapping as a within-subjects factor, with Age, Gender, and  
449 Impulsivity as covariates. We found no significant main effect of Feedback  $F(1,45) = 0.10$ ,  $p =$   
450  $.751$ ,  $\eta_p^2 < .01$ , or Mapping,  $F(1,45) = 0.14$ ,  $p = .705$ ,  $\eta_p^2 < .01$ , but found a significant Feedback  
451 x Mapping interaction:  $F(1,45) = 4.73$ ,  $p = .035$ ,  $\eta_p^2 = .09$  (Fig 5), suggesting that Go accuracy

452 was affected differentially by performance feedback. Post-hoc paired-samples t-tests of Go  
453 accuracy across phases yielded evidence for an incongruency-related impairment in the No-  
454 Feedback group,  $t(24) = 3.22, p = .004$ , but not in the Feedback group,  $t(24) = 1.14, p = .265$ .  
455 Indeed, the omnibus hierarchical regression model attributes Condition and Feedback regressors  
456 a significant role in predicting Go accuracy change ( $\beta_{\text{Condition}} = -0.32, p = .001, \beta_{\text{Feedback}} = 0.28, p$   
457  $= .003; \Delta R^2 = .18$ ).

458

459 **Fig 5. Performance feedback protects against habitual Go actions.** (A) When  
460 participants received cumulative feedback on their performance, the Go accuracy impairment  
461 otherwise observed without feedback was prevented when managing Familiar stimuli (Feedback  
462 x Mapping interaction  $p = .035$ ). (B) Performance feedback did not significantly improve Go  
463 accuracy in the Novel condition (Feedback x Mapping interaction  $p = .117$ ). Error bars denote  
464 SEM. Color of bars reflects Go stimulus colors.

465

466 Despite the significant Feedback regressor in the omnibus test, we did not observe a  
467 significant improvement effect due to cumulative performance feedback in the Novel condition  
468 Go accuracy results. A mixed-design ANOVA using Go accuracy as the DV, Feedback as the  
469 between-, and Mapping as the within-subjects factor, with Age, Gender, and Impulsivity as  
470 covariates revealed no significant main effect of Feedback,  $F(1,45) = 3.53, p = .067, \eta_p^2 = .07$ , or  
471 Mapping,  $F(1,45) = 3.14, p = .083, \eta_p^2 = .06$ , and no significant Feedback x Mapping interaction:  
472  $F(1,45) = 2.56, p = .117, \eta_p^2 = .05$  (Fig 5). Post-hoc paired-samples t-tests suggest an  
473 improvement effect only in the Feedback group:  $t(24) = -2.39, p = .025$  with feedback,  $t(24) =$   
474  $0.32, p = .749$  without feedback. Given the lack of significant Feedback x Mapping interaction in

475 the Novel condition, we refrain from speculating further about the effect of cumulative  
476 performance feedback on goal-directed Go responses. Similar analyses performed with Go RT as  
477 DV yielded no significant findings (all  $ps > .05$ ).

## 478 **Discussion**

479 In sum, we report that cumulative performance feedback is not sufficient to disrupt the  
480 well-learned habits elicited by the familiar stimuli used in our task. However, supplementary  
481 analyses using accessory measures of behavioral control (i.e., familiar Go accuracy), suggest that  
482 feedback may be a useful tool in enhancing behavioral flexibility. Therefore, these patterns  
483 warrant further examination of feedback to disrupt habitual control.

484 We conclude that cumulative performance feedback was not salient enough to break  
485 habits according to our primary analyses, yet our findings were valuable in two ways. First, the  
486 validity of our Go/NoGo task using well-learned associations to study habits relies on the rigidity  
487 of these green-go and red-stop associations. The persistent habitual control exhibited here  
488 despite the delivery of performance feedback lends credence to the associative strength of our  
489 familiar stimuli. Next, given the modest signs of performance improvement due to the  
490 presentation of performance information, early reports of combined (i.e., performance tracking  
491 and monetary incentives) feedback's positive effects on performance, and the beneficial effects  
492 of performance-contingent feedback on behavioral flexibility [23–27], we were motivated to  
493 enhance the salience of the provided feedback to break well-learned habits. In Experiment 3, we  
494 further amplified the salience of the outcome by pairing performance-contingent cumulative  
495 feedback with a bonus monetary reward prior to changing Go and NoGo contingencies. We  
496 studied the effects of monetary and cumulative performance feedback on Go/NoGo task

497 performance, and whether this amplification of outcome salience resulted in the breaking of a  
498 well-learned habit, and improvement of novel, goal-directed performance.

### 499 **Experiment 3**

500 The promising but insufficient effect of cumulative performance feedback on the  
501 motivational control of action motivated us to examine the combined effect of performance and  
502 monetary input. Thus, we implemented in our mid-experiment performance feedback  
503 manipulation a cash bonus. We hypothesized that this bonus, combined with performance  
504 tracking information, would enhance goal salience and promote cognitive control processes to  
505 override habitual control. Experimental procedures were identical to those described in  
506 Experiment 2, with the addition of awarding participants in the Feedback group a surprise \$5  
507 cash bonus before the change in Go/NoGo mappings.

### 508 **Methods**

#### 509 **Participants**

510 To test the effects of dual feedback, we recruited the same number of participants for  
511 Experiment 3 as in Experiment 1. One-hundred participants (76 female, 24 male participants;  
512  $M_{\text{age}}=19.74$ ,  $SD_{\text{age}}=2.79$ ) from the Rutgers University-Newark undergraduate research subject  
513 pool were recruited for course credit. All participants provided informed consent. Study  
514 protocols were approved by the Rutgers University Institutional Review Board. Participants were  
515 excluded if they reported having color-blindness.

#### 516 **Procedures**

517 After completing BIS, participants underwent a similar Go/NoGo task to the one  
518 described in Experiment 2, where they were randomly assigned to Feedback and No Feedback

519 groups, and Familiar and Novel conditions. As in Experiment 2, each phase comprised 100 Go  
520 and 20 NoGo trials (5:1 Go–NoGo ratio), and the stimuli remained on the screen for 400 ms. Go  
521 and NoGo responses (or lack thereof) produced brief feedback slides consisting of “correct” or  
522 “incorrect” that offset after 400 ms (e.g., failure to withhold response in a NoGo trial produced  
523 the “incorrect” text slide). Go responses had to be performed before stimulus offset to be  
524 registered as correct by pressing the “1” key on the keyboard. The inter-trial intervals varied  
525 randomly between 1200 and 2400 ms to ensure engagement with the task. All participants  
526 completed a brief practice session prior to the task, similar to the previous two experiments.

527         Identical to Experiment 2, in the Familiar condition’s first phase, participants were  
528 instructed to “Go” on green traffic light stimuli as quickly and accurately as possible, and  
529 “NoGo” on red traffic light stimuli. Next, a monetary and cumulative performance feedback  
530 manipulation followed, in which we displayed participants’ cumulative NoGo accuracy as a  
531 percentage score on the screen. Participants were informed that the percentage score reflected  
532 their performance thus far. Additionally, unique to Experiment 3, the experimenter left the room,  
533 and returned briefly after with a \$5 bill, and informed the participant that this money was earned  
534 because of performance thus far in the task. Unbeknownst to the participants, the cash bonus was  
535 not actually contingent on performance. The participant was then informed that the Go and  
536 NoGo signals would be reversed, such that they would need to make a response as quickly and  
537 accurately as possible to the red traffic light, and refrain from responding to the green traffic  
538 light. Identical performance and monetary feedback information and reversal instructions were  
539 provided to the participants in the Novel condition regarding the reversal of purple–Go and blue–  
540 NoGo responses. An exit survey containing demographic questions concluded the experiment.



541 Participants in the No Feedback group underwent the same procedures as the Feedback  
542 group, except for the feedback manipulation, in that participants received no cumulative  
543 performance or monetary feedback.

## 544 **Data Analysis**

545 To reveal the potential effect of dual feedback on motivational control, we performed  
546 mixed-design ANOVAs with NoGo accuracy as the DV, Feedback as a between- and Mapping  
547 as a within-subjects factor for each Condition, using the Age, Gender, and Impulsivity variables  
548 as covariates. Post-hoc paired-samples t-tests were carried out when necessary to examine  
549 mapping-related accuracy differences in both Feedback groups. As a supplemental measure of  
550 outcome-sensitivity, identical tests were performed using Go accuracy as the DV. Similar  
551 analyses were performed with Go RT as DV to further explore the data. Identical to Experiment  
552 2, we performed a confirmatory omnibus hierarchical multiple regression to test the predictive  
553 strength of the Condition and Feedback variables on outcome-sensitivity. The summary of the  
554 omnibus regression test are reported below, and the details can be found in the supplement (S5  
555 and S6 Tables). Lastly, to further explore whether green-NoGo (i.e., the color-response mapping  
556 that is incongruent with daily experiences) elicits lower accuracy rates compared to either Novel  
557 color-response mapping with sufficient power, we pooled Experiment 2 and 3 data (due to their  
558 identical No-Feedback procedures) and performed independent-samples t-tests to compare  
559 green-NoGo accuracy to purple- and blue-NoGo accuracy in the No-Feedback conditions.

## 560 **Results**

### 561 **Primary index of outcome-sensitivity: NoGo accuracy**

562 We tested the role of dual feedback in disrupting habitual control to familiar stimuli by  
563 performing a mixed-design repeated measures ANOVA on data from the Familiar condition,

564 using NoGo accuracy as the DV. We found no main effect of Feedback,  $F(1,45) = 0.75, p = .390,$   
565  $\eta_p^2 = .10,$  or Mapping,  $F(1,45) = 1.51, p = .225, \eta_p^2 = .03,$  but found a significant Feedback x  
566 Mapping interaction when controlling for Age, Gender, and Impulsivity:  $F(1,45) = 5.24, p =$   
567  $.027, \eta_p^2 = .10$  (see Fig 6). This interaction suggests differential impairment based on the  
568 availability of cumulative performance and monetary feedback, such that the lack of feedback  
569 when managing familiar stimuli resulted in a significantly larger incongruency-related decrement  
570 in NoGo accuracy. Post-hoc t-tests confirmed a significant impairment in the No-Feedback  
571 group,  $t(24) = 5.25, p < .001,$  replicating our findings from Experiments 1 and 2, but no  
572 significant effect in the Feedback group  $t(24) = 1.92, p = .067.$

573

574 **Fig 6. Monetary and performance feedback disrupt habits while improving goal-**  
575 **directed performance to newly-learned stimuli.** (A) Providing performance and monetary  
576 feedback prevents the incongruency-related impairment normally indicative of habitual control  
577 (Feedback x Mapping interaction:  $p = .027$ ). (B) Dual feedback also improves goal-directed  
578 control of novel associations significantly (Feedback x Mapping interaction:  $p = .038$ ). Error bars  
579 denote SEM. Color of bars reflects NoGo stimulus colors.

580

581 To understand whether dual feedback enhanced goal-directed performance to newly-  
582 learned associations, we performed similar analyses on the Novel condition data. The mixed-  
583 design ANOVA, when controlling for Age, Gender, and Impulsivity as covariates, yielded no  
584 main effect of Feedback,  $F(1,45) = 0.10, p = .756, \eta_p^2 < .01,$  or Mapping,  $F(1,45) = 0.42, p =$   
585  $.522, \eta_p^2 = .01;$  however, we found a significant Feedback x Mapping interaction on NoGo  
586 accuracy in the Novel condition:  $F(1,45) = 4.55, p = .038, \eta_p^2 = .09$  (Fig 6). Post-hoc t-tests

587 revealed significant improvement of NoGo accuracy in the Feedback group,  $t(24) = -2.32$ ,  $p =$   
588  $.029$ , which was not observed in the No-Feedback group,  $t(24) = 0.08$ ,  $p = .938$ .

589 Consistent with these significant Feedback x Mapping interactions in both Familiar and  
590 Novel conditions, our omnibus hierarchical regression model revealed Condition and Feedback  
591 regressors to be significant predictors of outcome-sensitivity. Combined, Condition and  
592 Feedback explained 26.6% of the variance in mapping-related NoGo accuracy change ( $\beta_{\text{Condition}} =$   
593  $-0.43$ ,  $p < .001$ ,  $\beta_{\text{Feedback}} = 0.28$ ,  $p = .003$ ;  $\Delta R^2 = .27$ ). These data suggest that the differential  
594 mapping-related NoGo impairment observed in Experiment 2 was replicated in Experiment 3,  
595 and importantly, that dual feedback is able to significantly predict improvements in performance.  
596 The entirety of the omnibus test can be found in the supplement (S5 Table).

### 597 **Secondary index of outcome-sensitivity: Go accuracy**

598 As a supplementary assay of behavioral control, we analyzed Go accuracy using similar  
599 statistical procedures. We input Go accuracy as a DV, Feedback as a between-, and Mapping as a  
600 within-subjects factor, with Age, Gender, and Impulsivity as covariates into a mixed-design  
601 ANOVA. For the Familiar condition, we found no significant main effect of Feedback  $F(1,45) =$   
602  $2.36$ ,  $p = .131$ ,  $\eta_p^2 = .05$ , a significant main effect of Mapping,  $F(1,45) = 4.15$ ,  $p = .048$ ,  $\eta_p^2 =$   
603  $.08$ , but no significant Feedback x Mapping interaction:  $F(1,45) = 2.52$ ,  $p = .119$ ,  $\eta_p^2 = .05$  (Fig  
604 7), suggesting that Go accuracy was not significantly affected by dual feedback in the Familiar  
605 condition. However, post-hoc paired-samples t-tests revealed incongruency-related impairments  
606 in Go actions specific to the No Feedback group:  $t(24) = 2.58$ ,  $p = .017$  without feedback vs.  
607  $t(24) = 0.10$ ,  $p = .925$  with dual feedback. Given the lack of interaction, we refrain from asserting  
608 that dual feedback disrupts habitual Go actions—our secondary assay of outcome-sensitivity.

609

610 **Fig 7. Dual feedback improves goal-directed Go accuracy.** (A) Dual feedback did not  
611 have a significant effect on the incongruency-related Go accuracy impairment when managing  
612 well-learned cues ( $p = .119$ ). (B) Dual feedback improved goal-directed Go responses to novel  
613 associations ( $p = .012$ ). Error bars denote SEM. Color of bars reflects Go stimulus colors.

614

615 We then tested the effect of dual feedback on Go accuracy in the Novel condition to  
616 determine whether our enhanced feedback manipulation improved goal-directed control when  
617 managing the contingency changes in newly-learned associations. We performed a mixed-design  
618 repeated measures ANOVA using Go accuracy as the DV, Feedback as the between-, and  
619 Mapping as the within-subjects factor, with Age, Gender, and Impulsivity as covariates. This  
620 ANOVA yielded a significant main effect of Feedback,  $F(1,45) = 5.49, p = .024, \eta_p^2 = .11$ , and  
621 no significant effect of Mapping,  $F(1,45) = 0.49, p = .488, \eta_p^2 = .01$ ; however, it revealed a  
622 significant Feedback x Mapping interaction:  $F(1,45) = 6.93, p = .012, \eta_p^2 = .13$  (see Fig 7). Post-  
623 hoc t-tests of each Feedback group confirms that monetary incentives paired with cumulative  
624 performance feedback significantly improved newly-learned Go associations that are executed  
625 by the goal-directed system:  $t(24) = -4.86, p < .001$  with dual feedback,  $t(24) = -0.51, p = .616$   
626 with no feedback.

627 Our omnibus hierarchical regression model reveals that Condition and Feedback  
628 regressors significantly predict mapping-related Go accuracy changes. These regressors in sum  
629 account for 21% of the variance in the DV ( $\beta_{\text{Condition}} = -.36, p < .001, \beta_{\text{Feedback}} = .28, p = .004$ ;  
630  $\Delta R^2 = .21$ ). These values suggest that Go accuracy is selectively impaired in the Familiar  
631 condition, and Feedback is able to promote goal-directed Go actions. Due to the non-significant

632 Condition x Mapping interaction in the Familiar condition data, we restrict the scope of our dual  
633 feedback assertions on Go accuracy to the Novel condition. Details of the omnibus regression  
634 can be found in the supplement (S6 Table). Lastly, similar analyses performed with Go RT as  
635 DV yielded no significant findings (all  $ps > .05$ ).

636 Finally, when we combine No-Feedback groups in Experiments 2 and 3 where  
637 participants undergo identical procedures, we find that the green-NoGo mapping ( $M_{\text{Green}} = 64.30$ ,  
638  $SD_{\text{Green}} = 20.35$ ) yields significantly lower accuracy rates than either novel stimulus ( $M_{\text{Blue}} =$   
639  $75.40$ ,  $SD_{\text{Blue}} = 15.87$ ,  $M_{\text{Purple}} = 74.10$ ,  $SD_{\text{Purple}} = 16.03$ ) despite the between-subjects design  
640 (green vs. blue:  $t(98) = 3.04$ ,  $p = .003$ ; green vs. purple:  $t(98) = 2.67$ ,  $p = .009$ ). This result  
641 suggests that with sufficient power, we are able to detect that the incongruent color-response  
642 mapping yields impaired performance in comparison to the newly-learned color-response  
643 contingencies.

## 644 **Discussion**

645 Collectively, our Experiment 3 findings suggest that a global motivational boost  
646 involving amplified performance and monetary feedback produces a habit-breaking effect that  
647 restores goal-directed control. Without feedback, we observe a significant impairment in NoGo  
648 and Go accuracy when familiar green and red light stimuli demand responses incongruent with  
649 daily experiences. We find that this outcome-insensitive habit (i.e., inflexible, cue-driven  
650 behavior that persists despite the outcome) of the green-go and red-stop actions is disrupted  
651 when participants are provided dual feedback, such that the significant incongruency-related  
652 NoGo impairment otherwise seen without feedback is prevented. Moreover, our dual feedback  
653 manipulation also improves goal-directed control when managing newly-learned associations, as  
654 evidenced by significant enhancements to NoGo and Go performance in the Novel group.

655 Possibly, cumulative performance feedback may be enhancing intrinsic motivation. The  
656 percentage score may provide individuals the opportunity to track task performance  
657 improvements, potentially boosting motivation to improve task-competence [35]. Paired with the  
658 extrinsic reward of a monetary bonus, the dual feedback provided in our experiment may be  
659 producing a global increase in motivation, resulting in more deliberate control of otherwise  
660 inflexible behaviors.

661         Importantly, the beneficial effect of such feedback generalizes to more flexible goal-  
662 directed performance, as we observe a significant improvement in NoGo and Go accuracy scores  
663 to novel blue-go and purple-stop contingencies when participants are provided dual feedback.  
664 Without feedback, we find no mapping-related difference in accuracy to novel stimuli, serving as  
665 support for the flexible nature of these newly-learned associations that can readily be reassigned  
666 per changes in one's environment. These findings identify dual feedback as a powerful predictor  
667 of motivational control enhancement.

## 668 **General Discussion**

669         In a three-experiment study, we introduce a novel Go/NoGo task that capitalizes on  
670 familiar, well stamped-in associations of red-stop and green-go to elicit habitual control, and  
671 establish dual feedback (i.e., monetary reward paired with cumulative performance tracking) as  
672 an intervention to break these well-learned habits to restore goal-directed control. The familiar  
673 stimuli in our task evoke a color-response habit that is evident in our participants' difficulty  
674 overriding the well-established red-stop and green-go associations. We found that the familiar  
675 stimuli yield persistent instrumental responses even when these contingencies are manipulated to  
676 render green-go and red-stop color-responses disadvantageous for task performance. We also  
677 report enhanced goal-directed control (i.e., a disruption of the color-response habits) due to dual

678 feedback, lending support to the effectiveness and scope of our performance enhancing feedback  
679 manipulation.

680 Accordingly, an important goal of our study was to establish our paradigm as a tool that  
681 captures real-world habits. In Experiment 1, we demonstrated the rigidity of the familiar green–  
682 go and red–stop contingencies compared to the newly-learned, flexible associations. The  
683 outcome-insensitive responses elicited by the familiar stimuli were reflected by a significant  
684 mapping-related impairment not observed when participants managed novel stimuli.  
685 Specifically, participants had more difficulty with the green-NoGo association in relation to red-  
686 NoGo, whereas variations in color-response mappings did not produce significant differences  
687 when managing novel associations (e.g., blue-NoGo or purple-NoGo). It is worth mentioning  
688 that the habits demonstrated here are not effector specific, in that we do not assert whether red  
689 and green light stimuli trigger actions that are alike those that may be triggered in a driving  
690 context (e.g., a foot-press response at red, or foot-release at green). Rather, the familiar stimuli  
691 used in our task may be evoking a general approach and avoid response, which, in the context of  
692 the task, is mapped onto Go and NoGo responses.

693 If these familiar red and green stimuli elicit outcome-insensitive habits, it may be argued  
694 the color-response mapping that is incongruent with daily experiences should display the lowest  
695 accuracy rates. However, in Experiment 1, green-NoGo accuracy was comparable to those of  
696 blue or purple-NoGo mappings. This pattern may be due to between-subject designs requiring  
697 more power than within-subject designs [36], thus making it more difficult to detect a potential  
698 decrement in green-NoGo accuracy. To test this hypothesis, we combined the data from the No-  
699 Feedback groups in Experiments 2 and 3, where participants underwent identical procedures. We  
700 found that the green-NoGo mapping produced significantly lower accuracy rates than either

701 novel color-response mapping despite the between-subjects design. Furthermore, in a version of  
702 this task that employs a within-subject design in which all participants manage familiar and  
703 novel Go/NoGo contingencies, we indeed report significantly lower accuracy rates to green as a  
704 NoGo stimulus compared to all other colors (Ceceli et al., in press).

705 We then tested the strength of the habits evoked in our paradigm by introducing a  
706 motivation-based intervention: cumulative performance feedback. This type of feedback was not  
707 successful in preventing habitual control, supporting the notion that these existing habits are rigid  
708 enough to prevail even in the face of a motivational intervention. Nonetheless, performance  
709 feedback was able to produce promising results via secondary assays of behavioral flexibility.  
710 Namely, the prevention of habitual “Go” actions motivated the augmentation of our feedback  
711 manipulation to amplify its effect on motivational control. In Experiment 3, our combined  
712 delivery of performance and monetary feedback prevented the mapping-related impairment that  
713 is the result of a habit-dominated action control system, possibly improving goal-directed control  
714 by enhancing the salience of the outcome. In sum, we demonstrated well-existing habits, tested  
715 the limits of their associative strength, and provided the foundation for better understanding the  
716 restoration of goal-directed control.

717 Many habit paradigms that emulate the outcome-insensitive nature of habits have in  
718 common a shortcoming that limits generalizability to the typical habit experience: difficulty  
719 capturing well-learned habits in the lab that can provide a platform for studying habit disruption.  
720 Habit strength is limited by the participants’ brief exposure to experimental paradigms, and  
721 targeting these behaviors that are rendered inflexible in the lab may not be representative of  
722 habits encountered in the real world [18]. Perhaps due to these difficulties, well-learned habits  
723 and habit disruption research have been relatively better-represented in field experiments



724 compared to the laboratory setting. For example, several field studies have examined the efficacy  
725 of interventions to change various presentations of daily habits, such as recycling and snacking  
726 habits [37–39]. However, recent efforts to bridge lab and field experiments have shown  
727 promising results. Although not an experiment of habit disruption, in a recent report, the slips-of-  
728 action task in the lab was examined alongside a more ecologically-relevant representation of  
729 habits—namely the habit of using one’s house keys. In this study, participants demonstrated an  
730 outcome-insensitive habit by making key choice errors, such that they persisted in choosing the  
731 incorrect key following a change in key covers. The attentional underpinnings of this behavior  
732 significantly correlated with slips of action performance, underlining the importance of focusing  
733 on well-established behaviors for an improved empirical approach to habit research [40].

734         One strategy that has proven beneficial in tackling habit change is implementation  
735 intentions, which provides individuals with an if-then plan (i.e., “if X happens, I will do Y”; or in  
736 a lab task, “if I see stimulus X, I will press Y”)—an aid to override unwanted or inflexible  
737 behaviors [41]. In the lab, implementation intentions have produced promising results, albeit  
738 with limited efficacy in disrupting strong habits. For instance, Webb and colleagues trained  
739 participants for five days on a target detection task, and successfully disrupted this lab-automated  
740 association using implementation intentions. However, this planning strategy did not break  
741 unwanted smoking habits, lending credence to the idea that the experimental resources at our  
742 disposal may not be sufficient in effectively stopping well-established habits [42]. Although this  
743 study approached habitual control from an attentional rather than a value-driven perspective,  
744 paralleling evidence from the motivational control literature has recently been reported. In  
745 another lab study, Verhoeven et al. employed planning strategies within a single experimental  
746 session to reduce action slips in an outcome-devaluation task [43]. Implementation intentions

747 were more effective than goal-intentions (an outcome-based planning strategy, such as “I will not  
748 press for outcome X”) in reducing action slips when managing abstract images as outcomes,  
749 suggesting that implementation intentions may serve as a promising strategy in studying habit  
750 disruption—however, effective paradigms to demonstrate well-learned, outcome-insensitive  
751 habits, and an intervention to disrupt them are needed. In our study, we developed a task that  
752 allowed us to directly capture ecologically significant, well-established habits via the familiar  
753 green–go and red–stop associations. We present our Go/NoGo task with familiar and novel  
754 stimuli as a strong candidate for demonstrating habitual behaviors—bridging the success of field  
755 studies with the rigor and controllability of lab experimentation. We also illustrate that a salient  
756 feedback-based intervention may be utilized to shift cue-driven performance to become value-  
757 driven, laying the foundation to translational applications.

758         Our work also asserts that the use of familiar stimuli may circumvent the obstacles of  
759 training length and stimulus–response strength in habit research—an important step in improving  
760 paradigms to foster effective habit disruption strategies. A few prior studies have considered a  
761 similar approach. In a study investigating habits in substance use disorder, McKim and  
762 colleagues induced stimulus familiarity by pre-training a set of stimuli, and tested the strength of  
763 the familiar versus novel stimulus sets on a subsequent day via the reversal of a sub-set of these  
764 contingencies [17]. They found that compared to healthy controls, individuals with substance use  
765 disorder performed better in well-learned stimulus–response execution, yet exhibited  
766 impairments in managing contingency reversal. In accord with these findings, our study reveals  
767 that when managing contingencies that have been well-established throughout development—  
768 beyond an experimental pre-training stage—the recruitment of the habit system may also be  
769 evident in healthy individuals. Similarly, developmental and clinical researchers have used

770 familiar green and red stimuli in Go/NoGo tasks with children suffering from attention  
771 deficit/hyperactivity disorder, as well as healthy adults to reduce task demands, and justified  
772 their decision by identifying these colors as having developmental relevance [19,20]. These prior  
773 reports highlight the utility of capitalizing on existing associations when examining habits,  
774 especially for clinical examinations of behavioral rigidity. Thus, we further contribute to the  
775 literature by introducing a task that requires minimal familiarity training, and by the inclusion of  
776 a motivational strategy to disrupt the familiarity-driven outcome-insensitivity. These  
777 contributions may be especially useful for optimizing costly fMRI designs, and benefit future  
778 translational neuroscience work that aims to reveal the neural bases of habit disruption.

779         The science of habits is a domain with direct clinical applications. The treatment of habit-  
780 based pathologies (e.g., obsessive-compulsive disorder) are within the scope of the habit  
781 literature, yet our field's disproportionate focus on the formation of rigid behaviors, rather than  
782 overcoming well-formed habits, limits the translational impact of our research [44]. Indeed,  
783 several studies have highlighted the habitual aspects of various clinical disorders, as well as their  
784 underlying neural mechanisms [e.g., 7,8,17,45–50]. Researchers have further employed  
785 neurotransmitter depletion to emulate the biochemical profiles of psychopathologies to detect  
786 action control deficits [9,51,52]. Sub-clinical symptom presentation has also been investigated  
787 from the perspective of action control [53–56]. Furthermore, the multi-faceted role of stress in  
788 dictating motivated behaviors has been extensively demonstrated under acute, chronic,  
789 interaction of acute and chronic, and pharmacologically induced stress hormone reactivity [57–  
790 64]. Therefore, although researchers have characterized numerous contexts in which habits are  
791 prevalent, interventions that restore goal-directed motivational control have not been examined  
792 with similar vigor. As we demonstrate the habit-breaking effects of pairing monetary reward

793 with cumulative performance feedback to amplify the salience of goals, we highlight the need for  
794 research avenues that not only identify goal-directed control deficits in clinical disorders, but  
795 work toward restoring these deficits to improve treatment strategies and quality of life.

## 796 **Conclusions**

797       The disproportionate focus on habit formation and expression in the literature motivated  
798 us to direct our efforts to an area of habit research that has been less-explored: habit disruption.  
799 Although much research now confirms the habitual aspects of various pathologies, studies  
800 examining the restoration of these behavioral rigidities are relatively scarce. Here, we introduce a  
801 task that allows us to examine a more complete signature of motivational control by capturing  
802 well-learned habits and newly-learned goal-directed behaviors, as well as the possibility to test  
803 manipulations that may restore deliberate control. This method may be especially beneficial for  
804 understanding the neural markers of motivational control in healthy and compromised  
805 populations, as it capitalizes on existing associations that do not require extended lab-training.  
806 We also underline the efficacy of feedback in disrupting well-learned habits and promoting  
807 outcome-driven, goal-directed behaviors. This motivation-based manipulation may further  
808 inform the mechanisms underlying the habit disruption process—a translationally valuable  
809 research domain with direct clinical relevance.

## 810 **Acknowledgements**

811       This work was supported by a grant from the National Science Foundation  
812 (BCS1150708) awarded to Elizabeth Tricomi. We thank Zana Hariri, Sarah Ramirez, Christine  
813 Oti, and Charlie Ndouli for their assistance in data collection. We appreciate the helpful feedback  
814 from John O’Doherty and Omar D. Perez on a previous draft of this manuscript.

## 815 **References**

- 816 1. Dickinson A, Balleine B. Motivational control of goal-directed action. *Animal Learning &*  
817 *Behavior*. 1994;22: 1–18. doi:10.3758/BF03199951
- 818 2. Otto AR, Raio CM, Chiang A, Phelps EA, Daw ND. Working-memory capacity protects  
819 model-based learning from stress. *PNAS*. 2013;110: 20941–20946.  
820 doi:10.1073/pnas.1312011110
- 821 3. Otto AR, Skatova A, Madlon-Kay S, Daw ND. Cognitive control predicts use of model-  
822 based reinforcement learning. *J Cogn Neurosci*. 2015;27: 319–333.  
823 doi:10.1162/jocn\_a\_00709
- 824 4. Wood W, Runger D. Psychology of Habit. *Annual Review of Psychology*. 2016;67: 289–  
825 314. doi:10.1146/annurev-psych-122414-033417
- 826 5. Adams CD, Dickinson A. Instrumental responding following reinforcer devaluation. *The*  
827 *Quarterly Journal of Experimental Psychology Section B*. 1981;33: 109–121.  
828 doi:10.1080/14640748108400816
- 829 6. Adams CD. Variations in the sensitivity of instrumental responding to reinforcer  
830 devaluation. *The Quarterly Journal of Experimental Psychology Section B*. 1982;34: 77–98.  
831 doi:10.1080/14640748208400878
- 832 7. Alvares GA, Balleine BW, Guastella AJ. Impairments in Goal-Directed Actions Predict  
833 Treatment Response to Cognitive-Behavioral Therapy in Social Anxiety Disorder. *PLOS*  
834 *ONE*. 2014;9: e94778. doi:10.1371/journal.pone.0094778
- 835 8. Alvares GA, Balleine BW, Whittle L, Guastella AJ. Reduced goal-directed action control in  
836 autism spectrum disorder. *Autism Res*. 2016;9: 1285–1293. doi:10.1002/aur.1613
- 837 9. de Wit S, Standing HR, DeVito EE, Robinson OJ, Ridderinkhof KR, Robbins TW, et al.  
838 Reliance on habits at the expense of goal-directed control following dopamine precursor  
839 depletion. *Psychopharmacology*. 2012;219: 621. doi:10.1007/s00213-011-2563-2
- 840 10. Sjoerds Z, Dietrich A, Deserno L, de Wit S, Villringer A, Heinze H-J, et al. Slips of Action  
841 and Sequential Decisions: A Cross-Validation Study of Tasks Assessing Habitual and Goal-  
842 Directed Action Control. *Front Behav Neurosci*. 2016;10: 234.  
843 doi:10.3389/fnbeh.2016.00234
- 844 11. Tricomi E, Balleine BW, O’Doherty JP. A specific role for posterior dorsolateral striatum  
845 in human habit learning. *European Journal of Neuroscience*. 2009;29: 2225–2232.  
846 doi:10.1111/j.1460-9568.2009.06796.x
- 847 12. Valentin VV, Dickinson A, O’Doherty JP. Determining the Neural Substrates of Goal-  
848 Directed Learning in the Human Brain. *J Neurosci*. 2007;27: 4019–4026.  
849 doi:10.1523/JNEUROSCI.0564-07.2007

- 850 13. Daw ND, Niv Y, Dayan P. Uncertainty-based competition between prefrontal and  
851 dorsolateral striatal systems for behavioral control. *Nat Neurosci.* 2005;8: 1704–1711.  
852 doi:10.1038/nn1560
- 853 14. De Houwer J, Tanaka A, Moors A, Tibboel H. Kicking the habit: Why evidence for habits  
854 in humans might be overestimated. *Motivation Science.* 2018;4: 50–59.  
855 doi:10.1037/mot0000065
- 856 15. de Wit S, Kindt M, Knot SL, Verhoeven AAC, Robbins TW, Gasull-Camos J, et al.  
857 Shifting the balance between goals and habits: Five failures in experimental habit induction.  
858 *J Exp Psychol Gen.* 2018;147: 1043–1065. doi:10.1037/xge0000402
- 859 16. Watson P, de Wit S. Current limits of experimental research into habits and future  
860 directions. *Current Opinion in Behavioral Sciences.* 2018;20: 33–39.  
861 doi:10.1016/j.cobeha.2017.09.012
- 862 17. McKim TH, Bauer DJ, Boettiger CA. Addiction History Associates with the Propensity to  
863 Form Habits. *J Cogn Neurosci.* 2016;28: 1024–1038. doi:10.1162/jocn\_a\_00953
- 864 18. Ceceli AO, Tricomi E. Habits and goals: a motivational perspective on action control.  
865 *Current Opinion in Behavioral Sciences.* 2018;20: 110–116.  
866 doi:10.1016/j.cobeha.2017.12.005
- 867 19. Suskauer SJ, Simmonds DJ, Fotedar S, Blankner JG, Pekar JJ, Denckla MB, et al.  
868 Functional Magnetic Resonance Imaging Evidence for Abnormalities in Response  
869 Selection in Attention Deficit Hyperactivity Disorder: Differences in Activation Associated  
870 with Response Inhibition but Not Habitual Motor Response. *J Cogn Neurosci.* 2008;20:  
871 478–493. doi:10.1162/jocn.2008.20032
- 872 20. Mostofsky SH, Schafer JGB, Abrams MT, Goldberg MC, Flower AA, Boyce A, et al. fMRI  
873 evidence that the neural basis of response inhibition is task-dependent. *Cognitive Brain  
874 Research.* 2003;17: 419–430. doi:10.1016/S0926-6410(03)00144-7
- 875 21. Naito E, Matsumura M. Movement-related potentials associated with motor inhibition  
876 under different preparatory states during performance of two visual stop signal paradigms  
877 in humans. *Neuropsychologia.* 1996;34: 565–573. doi:10.1016/0028-3932(95)00140-9
- 878 22. Kluger AN, DeNisi A. The effects of feedback interventions on performance: A historical  
879 review, a meta-analysis, and a preliminary feedback intervention theory. *Psychological  
880 Bulletin.* 1996;119: 254–284. doi:10.1037/0033-2909.119.2.254
- 881 23. Montague WE, Webber CE. Effects of Knowledge of Results and Differential Monetary  
882 Reward on Six Uninterrupted Hours of Monitoring. *Hum Factors.* 1965;7: 173–180.  
883 doi:10.1177/001872086500700209
- 884 24. Yee DM, Krug MK, Allen AZ, Braver TS. Humans Integrate Monetary and Liquid  
885 Incentives to Motivate Cognitive Task Performance. *Front Psychol.* 2016;6.  
886 doi:10.3389/fpsyg.2015.02037

- 887 25. Kleinsorge T, Rinkenauer G. Effects of monetary incentives on task switching. *Exp*  
888 *Psychol.* 2012;59: 216–226. doi:10.1027/1618-3169/a000146
- 889 26. Zedelius CM, Veling H, Bijleveld E, Aarts H. Promising High Monetary Rewards for  
890 Future Task Performance Increases Intermediate Task Performance. *PLOS ONE.* 2012;7:  
891 e42547. doi:10.1371/journal.pone.0042547
- 892 27. Shen YJ, Chun MM. Increases in rewards promote flexible behavior. *Atten Percept*  
893 *Psychophys.* 2011;73: 938–952. doi:10.3758/s13414-010-0065-7
- 894 28. Umemoto A, Holroyd CB. Task-specific effects of reward on task switching. *Psychol Res.*  
895 2015;79: 698–707. doi:10.1007/s00426-014-0595-z
- 896 29. Patton JH, Stanford MS, Barratt ES. Factor structure of the barratt impulsiveness scale. *J*  
897 *Clin Psychol.* 1995;51: 768–774. doi:10.1002/1097-4679(199511)51:6<768::AID-  
898 JCLP2270510607>3.0.CO;2-1
- 899 30. Young ME, Sutherland SC, McCoy AW. Optimal go/no-go ratios to maximize false alarms.  
900 *Behav Res.* 2018;50: 1020–1029. doi:10.3758/s13428-017-0923-5
- 901 31. Finn PR, Justus A, Mazas C, Steinmetz JE. Working memory, executive processes and the  
902 effects of alcohol on Go/No-Go learning: testing a model of behavioral regulation and  
903 impulsivity. *Psychopharmacology (Berl).* 1999;146: 465–472.
- 904 32. Dickinson A, Balleine B, Watt A, Gonzalez F, Boakes RA. Motivational control after  
905 extended instrumental training. *Animal Learning & Behavior.* 1995;23: 197–206.  
906 doi:10.3758/BF03199935
- 907 33. Deci EL. Effects of externally mediated rewards on intrinsic motivation. *Journal of*  
908 *Personality and Social Psychology.* 1971;18: 105–115. doi:10.1037/h0030644
- 909 34. Harackiewicz JM. The Effects of Reward Contingency and Performance Feedback on  
910 Intrinsic Motivation. *Journal of Personality and Social Psychology.* 1979;37: 1352–63.
- 911 35. Ryan RM, Deci EL. Intrinsic and Extrinsic Motivations: Classic Definitions and New  
912 Directions. *Contemporary Educational Psychology.* 2000;25: 54–67.  
913 doi:10.1006/ceps.1999.1020
- 914 36. Charness G, Gneezy U, Kuhn MA. Experimental methods: Between-subject and within-  
915 subject design. *Journal of Economic Behavior & Organization.* 2012;81: 1–8.  
916 doi:10.1016/j.jebo.2011.08.009
- 917 37. Adriaanse MA, de Ridder DTD, de Wit JBF. Finding the Critical Cue: Implementation  
918 Intentions to Change One’s Diet Work Best When Tailored to Personally Relevant Reasons  
919 for Unhealthy Eating. *Pers Soc Psychol Bull.* 2009;35: 60–71.  
920 doi:10.1177/0146167208325612

- 921 38. Adriaanse MA, Vinkers CDW, de Ridder DTD, Hox JJ, de Wit JBF. Do implementation  
922 intentions help to eat a healthy diet? A systematic review and meta-analysis of the empirical  
923 evidence. *Appetite*. 2011;56: 183–193. doi:10.1016/j.appet.2010.10.012
- 924 39. Holland RW, Aarts H, Langendam D. Breaking and creating habits on the working floor: A  
925 field-experiment on the power of implementation intentions. *Journal of Experimental Social*  
926 *Psychology*. 2006;42: 776–783. doi:10.1016/j.jesp.2005.11.006
- 927 40. Linnebank FE, Kindt M, de Wit S. Investigating the balance between goal-directed and  
928 habitual control in experimental and real-life settings. *Learn Behav*. 2018;46: 306–319.  
929 doi:10.3758/s13420-018-0313-6
- 930 41. Gollwitzer PM. Implementation Intentions: Strong Effects of Simple Plans. *The*  
931 *American Psychologist*. 1999;54: 493–503. doi:10.1037/0003-066X.54.7.493
- 932 42. Webb TL, Sheeran P, Luszczynska A. Planning to break unwanted habits: Habit strength  
933 moderates implementation intention effects on behaviour change. *British Journal of Social*  
934 *Psychology*. 2009;48: 507–523. doi:10.1348/014466608X370591
- 935 43. Verhoeven AAC, Kindt M, Zomer CL, de Wit S. An experimental investigation of breaking  
936 learnt habits with verbal implementation intentions. *Acta Psychol (Amst)*. 2017;  
937 doi:10.1016/j.actpsy.2017.05.008
- 938 44. Griffiths KR, Morris RW, Balleine BW. Translational studies of goal-directed action as a  
939 framework for classifying deficits across psychiatric disorders. *Front Syst Neurosci*.  
940 2014;8: 101. doi:10.3389/fnsys.2014.00101
- 941 45. Banca P, Voon V, Vestergaard MD, Philipiak G, Almeida I, Pociinho F, et al. Imbalance in  
942 habitual versus goal directed neural systems during symptom provocation in obsessive-  
943 compulsive disorder. *Brain*. 2015;138: 798–811. doi:10.1093/brain/awu379
- 944 46. Delorme C, Salvador A, Valabrègue R, Roze E, Palminteri S, Vidailhet M, et al. Enhanced  
945 habit formation in Gilles de la Tourette syndrome. *Brain*. 2016;139: 605–615.  
946 doi:10.1093/brain/awv307
- 947 47. Gillan CM, Apergis-Schoute AM, Morein-Zamir S, Urcelay GP, Sule A, Fineberg NA, et  
948 al. Functional neuroimaging of avoidance habits in obsessive-compulsive disorder. *Am J*  
949 *Psychiatry*. 2015;172: 284–293. doi:10.1176/appi.ajp.2014.14040525
- 950 48. Morris RW, Quail S, Griffiths KR, Green MJ, Balleine BW. Corticostriatal Control of  
951 Goal-Directed Action Is Impaired in Schizophrenia. *Biological Psychiatry*. 2015;77: 187–  
952 195. doi:10.1016/j.biopsych.2014.06.005
- 953 49. Reiter AMF, Deserno L, Kallert T, Heinze H-J, Heinz A, Schlagenhauf F. Behavioral and  
954 Neural Signatures of Reduced Updating of Alternative Options in Alcohol-Dependent  
955 Patients during Flexible Decision-Making. *J Neurosci*. 2016;36: 10935–10948.  
956 doi:10.1523/JNEUROSCI.4322-15.2016



- 957 50. Sjoerds Z, de Wit S, van den Brink W, Robbins TW, Beekman ATF, Penninx BWJH, et al.  
958 Behavioral and neuroimaging evidence for overreliance on habit learning in alcohol-  
959 dependent patients. *Transl Psychiatry*. 2013;3: e337. doi:10.1038/tp.2013.107
- 960 51. Worbe Y, Palminteri S, Savulich G, Daw ND, Fernandez-Egea E, Robbins TW, et al.  
961 Valence-dependent influence of serotonin depletion on model-based choice strategy. *Mol*  
962 *Psychiatry*. 2016;21: 624–629. doi:10.1038/mp.2015.46
- 963 52. Worbe Y, Savulich G, de Wit S, Fernandez-Egea E, Robbins TW. Tryptophan Depletion  
964 Promotes Habitual over Goal-Directed Control of Appetitive Responding in Humans. *Int J*  
965 *Neuropsychopharmacol*. 2015;18: pyv013. doi:10.1093/ijnp/pyv013
- 966 53. Dietrich A, de Wit S, Horstmann A. General Habit Propensity Relates to the Sensation  
967 Seeking Subdomain of Impulsivity But Not Obesity. *Front Behav Neurosci*. 2016;10: 213.  
968 doi:10.3389/fnbeh.2016.00213
- 969 54. Hogarth L, Chase HW, Baess K. Impaired goal-directed behavioural control in human  
970 impulsivity. *Q J Exp Psychol (Hove)*. 2012;65: 305–316.  
971 doi:10.1080/17470218.2010.518242
- 972 55. Morris LS, Baek K, Voon V. Distinct cortico-striatal connections with subthalamic nucleus  
973 underlie facets of compulsivity. *Cortex*. 2017;88: 143–150.  
974 doi:10.1016/j.cortex.2016.12.018
- 975 56. Snorrason I, Lee HJ, de Wit S, Woods DW. Are nonclinical obsessive-compulsive  
976 symptoms associated with bias toward habits? *Psychiatry Research*. 2016;241: 221–223.  
977 doi:10.1016/j.psychres.2016.04.067
- 978 57. Radenbach C, Reiter AMF, Engert V, Sjoerds Z, Villringer A, Heinze H-J, et al. The  
979 interaction of acute and chronic stress impairs model-based behavioral control.  
980 *Psychoneuroendocrinology*. 2015;53: 268–280. doi:10.1016/j.psyneuen.2014.12.017
- 981 58. Schwabe L, Dalm S, Schächinger H, Oitzl MS. Chronic stress modulates the use of spatial  
982 and stimulus-response learning strategies in mice and man. *Neurobiology of Learning and*  
983 *Memory*. 2008;90: 495–503. doi:10.1016/j.nlm.2008.07.015
- 984 59. Schwabe L, Tegenthoff M, Höffken O, Wolf OT. Simultaneous Glucocorticoid and  
985 Noradrenergic Activity Disrupts the Neural Basis of Goal-Directed Action in the Human  
986 Brain. *J Neurosci*. 2012;32: 10146–10155. doi:10.1523/JNEUROSCI.1304-12.2012
- 987 60. Schwabe L, Wolf OT. Stress prompts habit behavior in humans. *J Neurosci*. 2009;29:  
988 7191–7198. doi:10.1523/JNEUROSCI.0979-09.2009
- 989 61. Schwabe L, Wolf OT. Socially evaluated cold pressor stress after instrumental learning  
990 favors habits over goal-directed action. *Psychoneuroendocrinology*. 2010;35: 977–986.  
991 doi:10.1016/j.psyneuen.2009.12.010

- 992 62. Schwabe L, Wolf OT. Stress increases behavioral resistance to extinction.  
993 Psychoneuroendocrinology. 2011;36: 1287–1293. doi:10.1016/j.psyneuen.2011.02.002
- 994 63. Soares JM, Sampaio A, Ferreira LM, Santos NC, Marques F, Palha JA, et al. Stress-induced  
995 changes in human decision-making are reversible. Transl Psychiatry. 2012;2: e131.  
996 doi:10.1038/tp.2012.59
- 997 64. Taylor SB, Anglin JM, Paode PR, Riggert AG, Olive MF, Conrad CD. Chronic stress may  
998 facilitate the recruitment of habit- and addiction-related neurocircuitries through neuronal  
999 restructuring of the striatum. Neuroscience. 2014;280: 231–242.  
1000 doi:10.1016/j.neuroscience.2014.09.029

1001

## 1002 **Supporting information**

1003 **S1 Table. Summary of the Hierarchical Multiple Regression Model for Outcome-**  
1004 **Insensitivity as Assayed by  $\Delta$ NoGo\_Accuracy.** Top layer of table depicts all regressors  
1005 included in the hierarchical model and their respective statistics. Bottom layer of table, Model  
1006 Summary Statistics, depicts the predictive strength of each model. Delta  $R^2$  ( $\Delta R^2$ ) and  
1007 corresponding  $F_{\text{change}}$  values denote the specific improvement of Model 2 over Model 1 in  
1008 predicting the dependent variable. Toler. = Tolerance; VIF = Variance Inflation Factor.  
1009 Significant p-values (alpha = .05) depicted in bold typeface.

1010 **S2 Table. Summary of the Hierarchical Multiple Regression Model for Outcome-**  
1011 **Insensitivity as Assayed by  $\Delta$ Go\_Accuracy.** Top layer of table depicts all regressors included  
1012 in the hierarchical model and their respective statistics. Bottom layer of table, Model Summary  
1013 Statistics, depicts the predictive strength of each model. Delta  $R^2$  ( $\Delta R^2$ ) and corresponding  $F_{\text{change}}$   
1014 values denote the specific improvement of Model 2 over Model 1 in predicting the dependent  
1015 variable. Toler. = Tolerance; VIF = Variance Inflation Factor. Significant p-values (alpha = .05)  
1016 depicted in bold typeface.

1017 **S3 Table. Summary of the Hierarchical Multiple Regression Model for Outcome-**  
1018 **Insensitivity as Assayed by  $\Delta$ NoGo\_Accuracy.** Top layer of table depicts all regressors  
1019 included in the hierarchical model and their respective statistics. Bottom layer of table, Model  
1020 Summary Statistics, depicts the predictive strength of each model. Delta  $R^2$  ( $\Delta R^2$ ) and  
1021 corresponding  $F_{\text{change}}$  values denote the specific improvement of Model 2 over Model 1 in  
1022 predicting the dependent variable. Toler. = Tolerance; VIF = Variance Inflation Factor.  
1023 Significant p-values (alpha = .05) depicted in bold typeface.

1024 **S4 Table. Summary of the Hierarchical Multiple Regression Model for Outcome-**  
1025 **Insensitivity as Assayed by  $\Delta$ Go\_Accuracy.** Top layer of table depicts all regressors included  
1026 in the hierarchical model and their respective statistics. Bottom layer of table, Model Summary  
1027 Statistics, depicts the predictive strength of each model. Delta  $R^2$  ( $\Delta R^2$ ) and corresponding  $F_{\text{change}}$   
1028 values denote the specific improvement of Model 2 over Model 1 in predicting the dependent

1029 variable. Toler. = Tolerance; VIF = Variance Inflation Factor. Significant p-values (alpha = .05)  
1030 depicted in bold typeface.

1031 **S5 Table. Summary of the Hierarchical Multiple Regression Model for Outcome-**  
1032 **Insensitivity as Assayed by  $\Delta$ NoGo\_Accuracy.** Top layer of table depicts all regressors  
1033 included in the hierarchical model and their respective statistics. Bottom layer of table, Model  
1034 Summary Statistics, depicts the predictive strength of each model. Delta  $R^2$  ( $\Delta R^2$ ) and  
1035 corresponding  $F_{\text{change}}$  values denote the specific improvement of Model 2 over Model 1 in  
1036 predicting the dependent variable. Toler. = Tolerance; VIF = Variance Inflation Factor.  
1037 Significant p-values (alpha = .05) depicted in bold typeface.

1038 **S6 Table. Summary of the Hierarchical Multiple Regression Model for Outcome-**  
1039 **Insensitivity as Assayed by  $\Delta$ Go\_Accuracy.** Top layer of table depicts all regressors included  
1040 in the hierarchical model and their respective statistics. Bottom layer of table, Model Summary  
1041 Statistics, depicts the predictive strength of each model. Delta ( $\Delta$ ) values denote the specific  
1042 improvement of Model 2 over Model 1 in predicting the dependent variable. Toler. = Tolerance;  
1043 VIF = Variance Inflation Factor. Significant p-values (alpha = .05) depicted in bold typeface.

1044

1045

## Familiar Condition

## Novel Condition

**Phase 1:** Instrumental response made to Go, and withheld to NoGo signals.

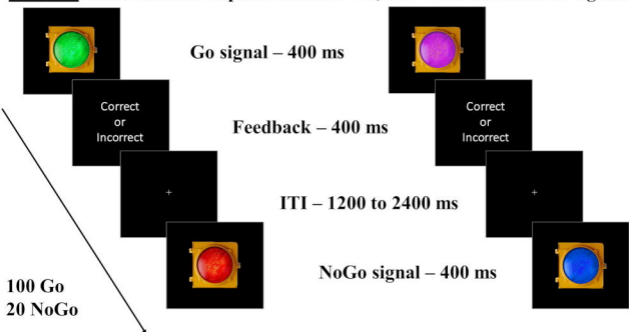

**Phase 2:** Go signals become NoGo signals and vice versa.

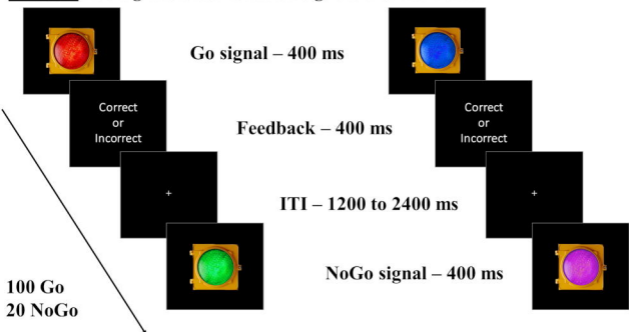

# Familiar stimuli elicit mapping-related impairments in NoGo accuracy

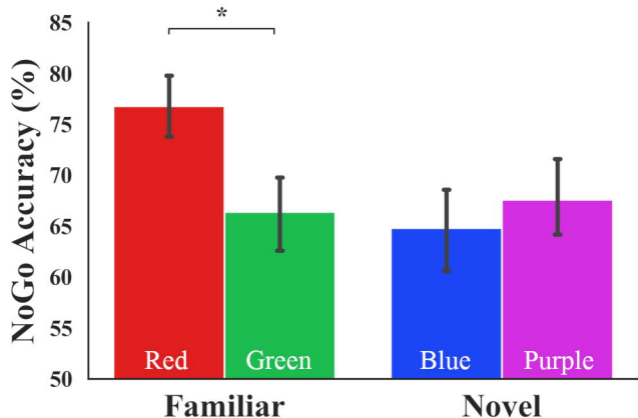

# Familiar stimuli elicit mapping-related impairments in Go accuracy

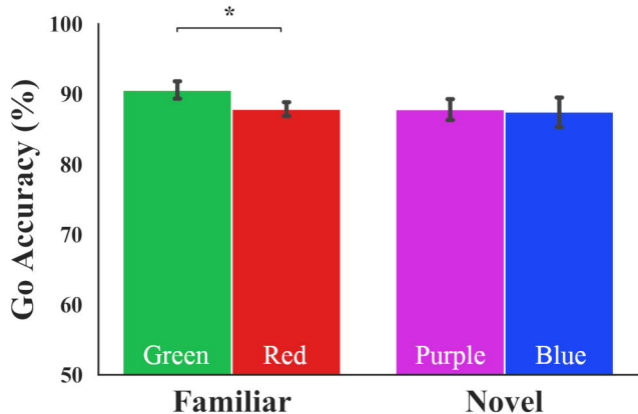

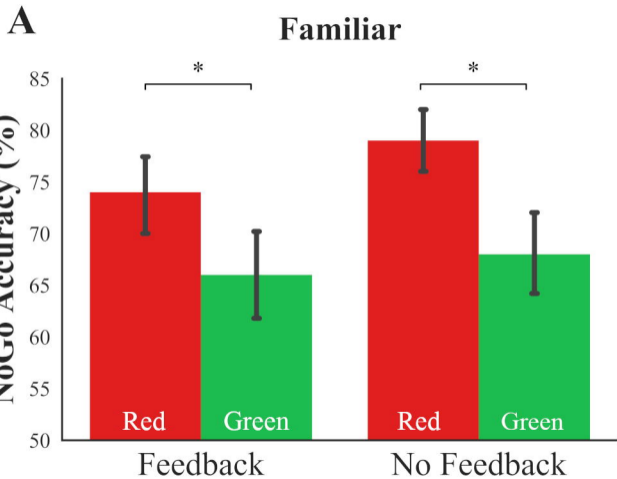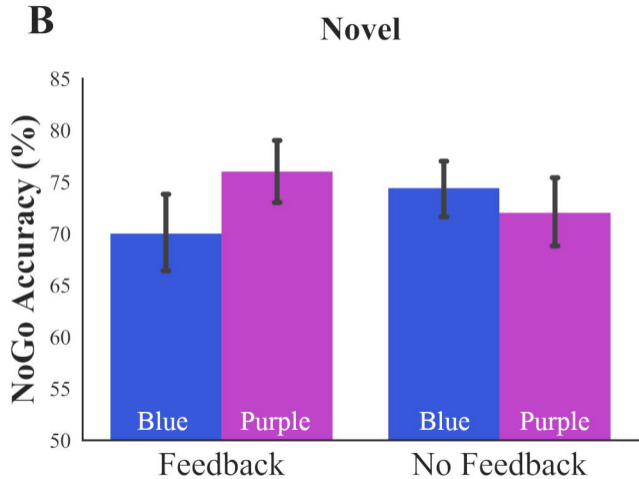

**A****Familiar**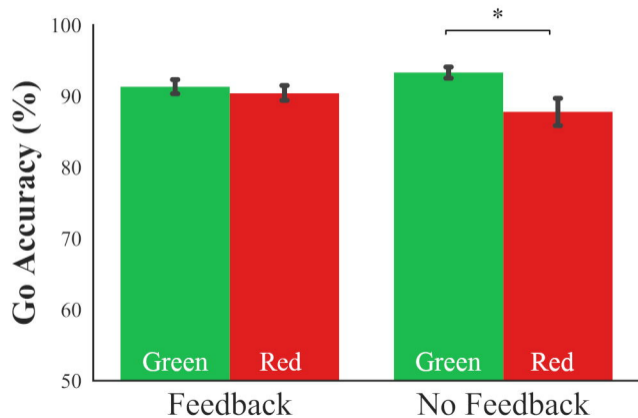**B****Novel**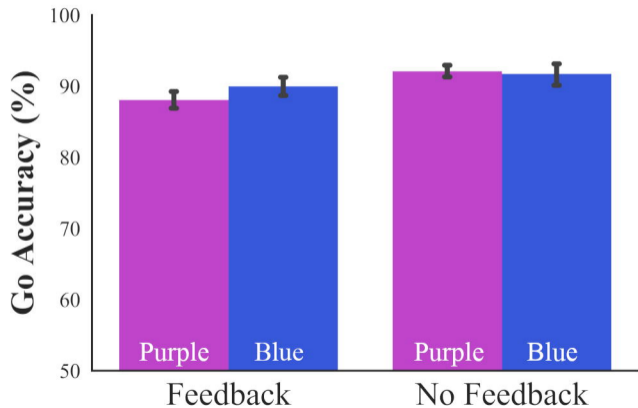



**A****Familiar**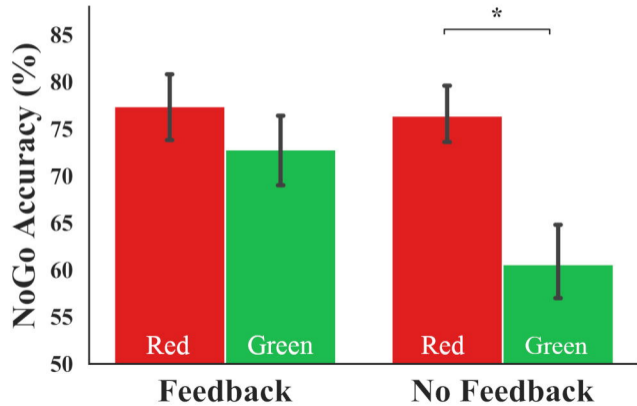**B****Novel**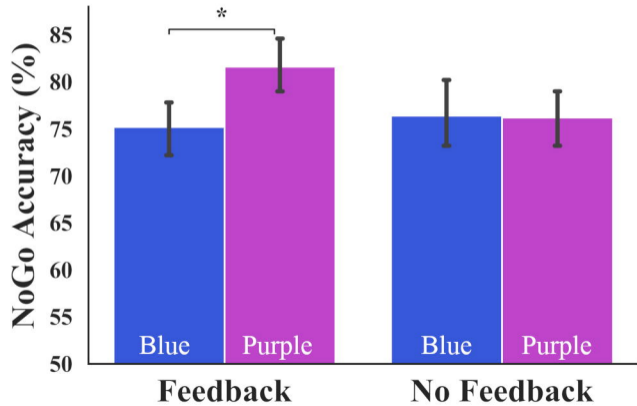

**A****Familiar**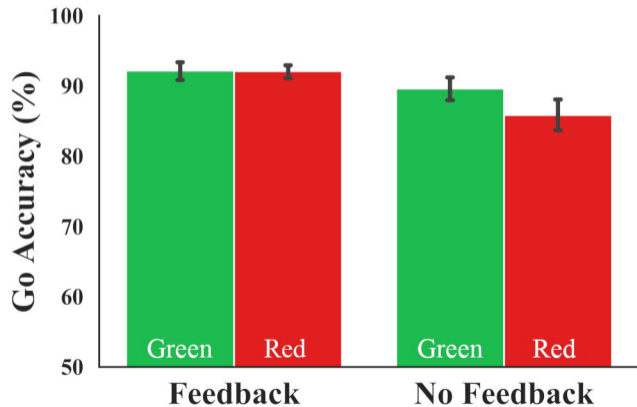**B****Novel**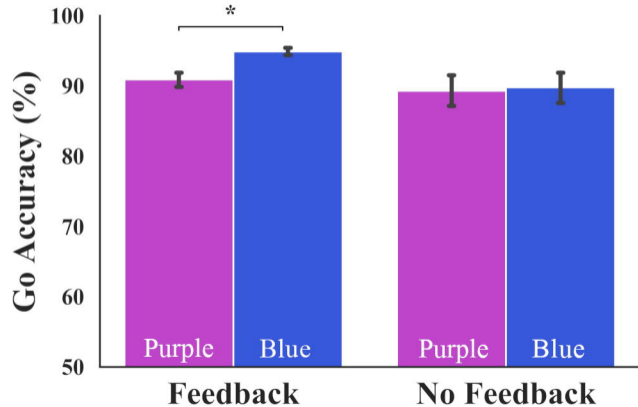

Source: https://www.biorxiv.org/content/10.1101/745356v2.full.pdf
